# Supplementary material
Source: ML conference proceedings conference paper supplement (https://proceedings.mlr.press/v89/ko19a.html)
Supplement: Supplementary file [file ko19a-supp.pdf]

# Supplementary Material for: Optimal Minimization of the Sum of Three Convex Functions with a Linear Operator

Seyoon Ko  
Seoul National University

Joong-Ho Won  
Seoul National University

## Abstract

This document contains supplementary details for the paper “Optimal Minimization of the Sum of Three Convex Functions with a Linear Operator.” All section, equation, table, and figure numbers in this supplementary document are preceded by a capital roman alphabet A, B, C, . . . . All section, equation, table, and figure numbers without an alphabet prefix refer to the main paper.

## A Proof of Proposition 1

*Proof of Proposition 1.* By the convexity of  $f$  and  $L_f$ -Lipschitz smoothness of  $\nabla f$ ,

$$\rho_k^{-1} f(x^{k+1}) \leq \rho_k^{-1} f(x_{md}^k) + \rho_k^{-1} \langle \nabla f(x_{md}^k), x^{k+1} - x_{md}^k \rangle + \frac{\rho_k^{-1} L_f}{2} \|x^{k+1} - x_{md}^k\|_2^2.$$

From equation (6b) in Algorithm 1,  $x^{k+1} - x_{md}^k = \rho_k(\tilde{x}^{k+1} - \tilde{x}^k)$ . Thus,

$$\begin{aligned} \rho_k^{-1} f(x^{k+1}) &\leq \rho_k^{-1} f(x_{md}^k) + \rho_k^{-1} \langle \nabla f(x_{md}^k), x^{k+1} - x_{md}^k \rangle + \frac{\rho_k L_f}{2} \|\tilde{x}^{k+1} - \tilde{x}^k\|_2^2 \\ &\stackrel{(6f)}{=} \rho_k^{-1} f(x_{md}^k) + (\rho_k^{-1} - 1) \langle \nabla f(x_{md}^k), x^k - x_{md}^k \rangle + \langle \nabla f(x_{md}^k), \tilde{x}^{k+1} - x_{md}^k \rangle + \frac{\rho_k L_f}{2} \|\tilde{x}^{k+1} - \tilde{x}^k\|_2^2 \\ &= (\rho_k^{-1} - 1) [f(x_{md}^k) + \langle \nabla f(x_{md}^k), x^k - x_{md}^k \rangle] + [f(x_{md}^k) + \langle f(x_{md}^k), \tilde{x}^{k+1} - x_{md}^k \rangle] + \frac{\rho_k L_f}{2} \|\tilde{x}^{k+1} - \tilde{x}^k\|_2^2 \\ &= (\rho_k^{-1} - 1) [f(x_{md}^k) + \langle \nabla f(x_{md}^k), x^k - x_{md}^k \rangle] + [f(x_{md}^k) + \langle f(x_{md}^k), x - x_{md}^k \rangle] \\ &\quad + \langle f(x_{md}^k), \tilde{x}^{k+1} - x \rangle + \frac{\rho_k L_f}{2} \|\tilde{x}^{k+1} - \tilde{x}^k\|_2^2 \\ &\leq (\rho_k^{-1} - 1) f(x^k) + f(x) + \langle \nabla f(x_{md}^k), \tilde{x}^{k+1} - x \rangle + \frac{\rho_k L_f}{2} \|\tilde{x}^{k+1} - \tilde{x}^k\|_2^2, \end{aligned} \tag{A.1}$$

where the last inequality again uses the convexity of  $f$ .

Now using the convexity of  $g$  and iteration (6f) in Algorithm 1, we have  $g(x^{k+1}) \leq (1 - \rho_k)g(x^k) + \rho_k g(\tilde{x}^{k+1})$ . Thus,

$$\rho_k^{-1} [g(x^{k+1}) - g(x)] \leq (\rho_k^{-1} - 1) [g(x^k) - g(x)] + [g(x^{k+1}) - g(x)]. \tag{A.2}$$

Likewise, by the convexity of  $h^*$  and iteration (6g) in Algorithm 1,

$$\rho_k^{-1} [h^*(x^{k+1}) - h^*(x)] \leq (\rho_k^{-1} - 1) [h^*(x^k) - h^*(x)] + [h^*(x^{k+1}) - h^*(x)]. \tag{A.3}$$

Combining inequalities (A.1), (A.2), and (A.3), it follows that

$$\begin{aligned} \rho_k^{-1} \mathcal{G}(z^{k+1}, z) &- (\rho_k^{-1} - 1) \mathcal{G}(z^k, z) \\ &= \rho_k^{-1} \{ [f(x^{k+1}) + g(x^{k+1}) + \langle Kx^{k+1}, y \rangle - h^*(y)] \\ &\quad - [f(x) + g(x) - \langle Kx, y^{k+1} \rangle - h^*(y^{k+1})] \} \\ &\quad + (\rho_k^{-1} - 1) \{ [f(x^k) + g(x^k) + \langle Kx^k, y \rangle - h^*(y)] \} \end{aligned}$$

$$\begin{aligned}
& -[f(x) + g(x) - \langle Kx, y^k \rangle - h^*(y^k)]\} \\
= & \rho_k^{-1} f(x^{k+1}) - (\rho_k^{-1} - 1)f(x^k) - f(x) \\
& + \rho_k^{-1}[g(x^{k+1}) - g(x)] - (\rho_k^{-1} - 1)[g(x^k) - g(x)] \\
& + \rho_k^{-1}[h^*(y^{k+1}) - h^*(y)] - (\rho_k^{-1} - 1)[h^*(y^k) - h^*(y)] \\
& + \langle K[\rho_k^{-1}x^{k+1} - (\rho_k^{-1} - 1)x^k], y \rangle - \langle Kx, \rho_k^{-1}y^{k+1} - (\rho_k^{-1} - 1)y^k \rangle \\
\leq & f(x) + \langle \nabla f(x_{md}^k, \tilde{x}^{k+1} - x) \rangle + \frac{\rho_k L_f}{2} \|x^{k+1} - x^k\|_2^2 \\
& + g(\tilde{x}^{k+1}) - g(x) + h^*(\tilde{y}^{k+1}) - h(y) \\
& + \langle K[\rho_k^{-1}x^{k+1} - (\rho_k^{-1} - 1)x^k], y \rangle - \langle Kx, \rho_k^{-1}y^{k+1} - (\rho_k^{-1} - 1)y^k \rangle \\
\leq & f(x) + \langle \nabla f(x_{md}^k, \tilde{x}^{k+1} - x) \rangle + \frac{\rho_k L_f}{2} \|x^{k+1} - x^k\|_2^2 \\
& + g(\tilde{x}^{k+1}) - g(x) + h^*(\tilde{y}^{k+1}) - h(y) + \langle Kx^{k+1}, y \rangle - \langle Kx, y^{k+1} \rangle.
\end{aligned}$$

□

## B Optimal deterministic acceleration

In this section, we provide proofs that Algorithm 1 achieves the theoretically optimal rate of convergence in the deterministic settings. We first consider the case in which  $\mathcal{X}$  and  $\mathcal{Y}$  are both bounded. We then proceed to the unbounded case. Proofs of all the technical lemmas required in the main proofs are deferred in Section D.

### B.1 Proof of Theorem 1

To prove Theorem 1, we need the following lemma.

**Lemma B.1.** *If  $z^k = (x^k, y^k)$  is obtained by (6), we have the following under the condition (15):*

$$\begin{aligned}
\rho_k^{-1} \gamma_k \mathcal{G}(z^{k+1}, z) \leq & \mathcal{D}_k(z, \tilde{z}^{[k]}) - \gamma_k \langle \tilde{x}^{k+1} - x, B^T(\tilde{y}^{k+1} - \tilde{y}^k) \rangle - \gamma_k \langle K(\tilde{x}^{k+1} - \tilde{x}^k), \tilde{y}^{k+1} - y \rangle \\
& - \gamma_k \left( \frac{1-q}{2\tau_k} - \frac{L_f \rho_k}{2} \right) \|\tilde{x}^{k+1} - \tilde{x}^k\|_2^2 - \gamma_k \frac{1-r}{2\sigma_k} \|\tilde{y}^{k+1} - \tilde{y}^k\|_2^2,
\end{aligned} \tag{B.1}$$

where

$$\gamma_k = \theta_k^{-1} \gamma_{k-1}, \quad \gamma_1 = 1, \tag{B.2}$$

and  $\mathcal{D}_k(z, \tilde{z}^{[k]})$  is defined by

$$\mathcal{D}_k(z, \tilde{z}^{[k]}) := \sum_{i=1}^k \left[ \frac{\gamma_i}{2\tau_i} (\|x - \tilde{x}^i\|_2^2 - \|x - \tilde{x}^{i+1}\|_2^2) + \frac{\gamma_i}{2\sigma_i} (\|y - \tilde{y}^i\|_2^2 - \|y - \tilde{y}^{i+1}\|_2^2) \right]. \tag{B.3}$$

*Proof of Theorem 1.* First we find an upper bound of  $\mathcal{D}_k(z, \tilde{z}^{[k]})$ .

$$\begin{aligned}
\mathcal{D}_k(z, \tilde{z}^{[k]}) &= \frac{\gamma_1}{2\tau_1} \|x - \tilde{x}^1\|_2^2 - \sum_{i=1}^{k-1} \frac{1}{2} \left( \frac{\gamma_i}{\tau_i} - \frac{\gamma_{i+1}}{\tau_{i+1}} \right) \|x - \tilde{x}^{i+1}\|_2^2 - \frac{\gamma_k}{2\tau_k} \|x - \tilde{x}^{k+1}\|_2^2 \\
&+ \frac{\gamma_1}{2\sigma_1} \|y - \tilde{y}^1\|_2^2 - \sum_{i=1}^{k-1} \frac{1}{2} \left( \frac{\gamma_i}{\sigma_i} - \frac{\gamma_{i+1}}{\sigma_{i+1}} \right) \|y - \tilde{y}^{i+1}\|_2^2 - \frac{\gamma_k}{2\sigma_k} \|y - \tilde{y}^{k+1}\|_2^2 \\
&\leq \frac{\gamma_1}{\tau_1} \Omega_X^2 - \sum_{i=1}^{k-1} \left( \frac{\gamma_i}{\tau_i} - \frac{\gamma_{i+1}}{\tau_{i+1}} \right) \Omega_X^2 - \frac{\gamma_k}{2\tau_k} \|x - \tilde{x}^{k+1}\|_2^2 \\
&+ \frac{\gamma_1}{\sigma_1} \Omega_Y^2 - \sum_{i=1}^{k-1} \left( \frac{\gamma_i}{\sigma_i} - \frac{\gamma_{i+1}}{\sigma_{i+1}} \right) \Omega_Y^2 - \frac{\gamma_k}{2\sigma_k} \|y - \tilde{y}^{k+1}\|_2^2
\end{aligned}$$

$$= \frac{\gamma_k}{\tau_k} \Omega_X^2 + \frac{\gamma_k}{\sigma_k} \Omega_Y^2 - \gamma_k \left( \frac{1}{2\tau_k} \|x - \tilde{x}^{k+1}\|_2^2 + \frac{1}{2\sigma_k} \|y - \tilde{y}^{k+1}\|_2^2 \right), \quad (\text{B.4})$$

where we used (14) for the inequality.

Consider the following upper bounds of the three inner product terms in (B.1):

$$\begin{aligned} |\gamma_k \langle \tilde{x}^{k+1} - x, B^T(\tilde{y}^{k+1} - \tilde{y}^k) \rangle| &\leq \frac{\gamma_k q}{2\tau_k} \|\tilde{x}^{k+1} - x\|_2^2 + \frac{\|B\|_2^2 \gamma_k \tau_k}{2q} \|\tilde{y}^{k+1} - \tilde{y}^k\|_2^2 \\ |\gamma_k \langle \tilde{x}^{k+1} - \tilde{x}^k, K^T(\tilde{y}^{k+1} - y) \rangle| &\leq \frac{L_K^2 \gamma_k \sigma_k}{2r} \|\tilde{x}^{k+1} - \tilde{x}^k\|_2^2 + \frac{\gamma_k r}{2\sigma_k} \|\tilde{y}^{k+1} - y\|_2^2. \end{aligned} \quad (\text{B.5})$$

Then (15a), Lemma B.1, (B.4), and (B.5) imply that

$$\begin{aligned} \rho_k^{-1} \gamma_k \mathcal{G}(z^{k+1}, z) &\leq \frac{\gamma_k}{\tau_k} \Omega_X^2 + \frac{\gamma_k}{\sigma_k} \Omega_Y^2 - \gamma_k \frac{1-q}{2\tau_k} \|x - \tilde{x}^{k+1}\|_2^2 \\ &\quad - \gamma_k \left( \frac{1-r}{2\sigma_k} \right) \|y - \tilde{y}^{k+1}\|_2^2 \\ &\quad - \gamma_k \left( \frac{1-q}{2\tau_k} - \frac{L_f \rho_k}{2} - \frac{L_K^2 \sigma_k}{2} \right) \|\tilde{x}^{k+1} - \tilde{x}^k\|_2^2 \\ &\quad - \gamma_k \left( \frac{1-r}{2\sigma_k} - \frac{\tau_k \|B\|_2^2}{2} \right) \|\tilde{y}^{k+1} - \tilde{y}^k\|_2^2 \\ &\leq \frac{\gamma_k}{\tau_k} \Omega_X^2 + \frac{\gamma_k}{\sigma_k} \Omega_Y^2. \end{aligned}$$

That is, (17). □

## B.2 Proof of Corollary 1

*Proof of Corollary 1.* First check (7), (9), and (18) satisfy (15):

$$\begin{aligned} \frac{1-q}{\tau_k} - L_f \rho_k - \frac{L_K^2 \sigma_k}{r} &\geq \left( (1-q)P_2 - \frac{1}{r} \right) \frac{\Omega_X L_K}{\Omega_Y} \geq 0, \\ \frac{1-r}{\sigma_k} - \tau_k \frac{\|B\|_2^2}{q} &\geq \left( 1-r - \frac{b^2/q}{P_2} \right) \frac{\Omega_X L_K}{\Omega_Y} \geq 0, \end{aligned}$$

Then by (17), we have

$$\begin{aligned} \mathcal{G}^*(z^k) &\leq \frac{\rho_{k-1}}{\tau_{k-1}} \Omega_X^2 + \frac{\rho_{k-1}}{\sigma_{k-1}} \Omega_Y^2 \\ &= \frac{4P_1 L_f + 2P_2(k-1)L_K \Omega_Y / \Omega_X}{k(k-1)} \Omega_X^2 + \frac{2L_K \Omega_X / \Omega_Y}{k} \Omega_Y^2 \\ &= \frac{4P_1 \Omega_X^2}{k(k-1)} L_f + \frac{2\Omega_X \Omega_Y (P_2 + 1)}{k} L_K. \end{aligned}$$

□

## B.3 Proof of Theorem 2

We need the following lemma to prove Theorem 2.

**Lemma B.2.** *Consider a saddle point  $\hat{z} = (\hat{x}, \hat{y})$  of the problem (PD), and the parameters  $\rho_k$ ,  $\theta_k$ ,  $\tau_k$ , and  $\sigma_k$  satisfying the conditions for Theorem 2. Then*

$$\|x - \tilde{x}^1\|_2^2 + \frac{\tau_k}{\sigma_k} \|y - \tilde{y}^1\|_2^2 \geq (1-q) \|x - \tilde{x}^{k+1}\|_2^2 + \frac{\tau_k}{\sigma_k} \left( \frac{1}{2} - r \right) \|y - \tilde{y}^{k+1}\|_2^2 \quad (\text{B.6})$$

and

$$\tilde{\mathcal{G}}(\tilde{z}^{k+1}, v^{k+1}) \leq \frac{\rho_k}{2\tau_k} \|x^{k+1} - \tilde{x}^1\|_2^2 + \frac{\rho_k}{2\sigma_k} \|y^{k+1} - \tilde{y}^1\|_2^2 =: \delta_{k+1} \quad (\text{B.7})$$

for all  $t \geq 1$ , where

$$v^{k+1} = \left( \frac{\rho_k}{\tau_k} (\tilde{x}^1 - \tilde{x}^{k+1}) - B^T(\tilde{y}^{k+1} - \tilde{y}^k), \frac{\rho_k}{\sigma_k} (\tilde{y}^1 - \tilde{y}^{k+1}) - K(\tilde{x}^{k+1} - \tilde{x}^k) \right). \quad (\text{B.8})$$

*Proof of Theorem 2.* It is sufficient to find upper bounds of  $\|v^{k+1}\|_2$  and  $\delta_{k+1}$ . From the definition of  $R$  and (B.6), we have  $\|\hat{x} - \tilde{x}^{k+1}\|_2 \leq \mu R$  and  $\|\hat{y} - \tilde{y}^{k+1}\|_2 \leq \sqrt{\frac{\sigma_k}{\tau_k}} \nu R$ . For  $v^{k+1}$  defined in (B.8),

$$\begin{aligned} \|v^{k+1}\|_2 &\leq \rho_k \left( \frac{1}{\tau_k} \|\tilde{x}^1 - \tilde{x}^{k+1}\|_2 + \|B\|_2 \|\tilde{y}^{k+1} - \tilde{y}^k\|_2 \right. \\ &\quad \left. + \frac{1}{\sigma_k} \|\tilde{y}^1 - \tilde{y}^{k+1}\|_2 + L_K \|\tilde{x}^{k+1} - \tilde{x}^k\|_2 \right) \\ &\leq \rho_k \left( \frac{1}{\tau_k} (\|\hat{x} - \tilde{x}^1\|_2 + \|\hat{x} - \tilde{x}^{k+1}\|_2) + \frac{1}{\sigma_k} (\|\hat{y} - \tilde{y}^1\|_2 + \|\hat{y} - \tilde{y}^{k+1}\|_2) \right. \\ &\quad \left. + L_K (\|\hat{x} - \tilde{x}^{k+1}\|_2 + \|\hat{x} - \tilde{x}^k\|_2) + \|B\|_2 (\|\hat{y} - \tilde{y}^{k+1}\|_2 + \|\hat{y} - \tilde{y}^k\|_2) \right) \\ &\leq \frac{\rho_k}{\tau_k} \|\hat{x} - \tilde{x}^1\|_2 + \frac{\rho_k}{\sigma_k} \|\hat{y} - \tilde{y}^1\|_2 \\ &\quad + \rho_k \left( \frac{1}{\tau_k} + 2L_K \right) \mu R + \rho_k \left( \frac{1}{\sigma_k} + 2\|B\|_2 \right) \nu R \\ &= \frac{\rho_k}{\tau_k} \|\hat{x} - \tilde{x}^1\|_2 + \frac{\rho_k}{\sigma_k} \|\hat{y} - \tilde{y}^1\|_2 \\ &\quad + R \left[ \frac{\rho_k}{\tau_k} \left( \mu + \frac{\tau_1}{\sigma_1} \nu \right) + 2\rho_k (L_K \mu + \|B\|_2 \nu) \right], \end{aligned}$$

i.e., (22). In the last equality, we used

$$\frac{1}{\sigma_k} = \frac{\tau_k}{\sigma_k} \frac{1}{\tau_k} = \frac{\tau_1}{\sigma_1} \frac{1}{\tau_k}.$$

Next, we find an upper bound for  $\delta_{k+1}$  defined in Lemma B.2.

$$\begin{aligned} \delta_{k+1} &= \frac{\rho_k}{2\tau_k} \|x^{k+1} - \tilde{x}^1\|_2^2 + \frac{\rho_k}{2\sigma_k} \|y^{k+1} - \tilde{y}^1\|_2^2 \\ &\leq \frac{\rho_k}{\tau_k} (\|\hat{x} - x^{k+1}\|_2^2 + \|\hat{x} - \tilde{x}^1\|_2^2) + \frac{\rho_k}{\sigma_k} (\|\hat{y} - y^{k+1}\|_2^2 + \|\hat{y} - \tilde{y}^1\|_2^2) \\ &= \frac{\rho_k}{\tau_k} \left( (R^2 + (1-q)\|\hat{x} - x^{k+1}\|_2^2 + \frac{\tau_k}{\sigma_k} (1/2-r)\|\hat{y} - y^{k+1}\|_2^2 \right. \\ &\quad \left. + q\|\hat{x} - x^{k+1}\|_2^2 + \frac{\tau_k}{\sigma_k} (r+1/2)\|\hat{y} - y^{k+1}\|_2^2 \right) \\ &\leq \frac{\rho_k}{\tau_k} \left[ R^2 + \frac{\rho_k}{\gamma_k} \sum_{i=1}^k \gamma_i \left[ (1-q)\|\hat{x} - \tilde{x}^{i+1}\|_2^2 + \frac{\tau_k}{\sigma_k} (1/2-r)\|\hat{y} - \tilde{y}^{i+1}\|_2^2 \right. \right. \\ &\quad \left. \left. + q\|\hat{x} - \tilde{x}^{i+1}\|_2^2 + \frac{\tau_k}{\sigma_k} (r+1/2)\|\hat{y} - \tilde{y}^{i+1}\|_2^2 \right] \right] \\ &\leq \frac{\rho_k}{\tau_k} \left[ R^2 + \frac{\rho_k}{\gamma_k} \sum_{i=1}^k \gamma_i \left[ R^2 + q\|\hat{x} - \tilde{x}^{i+1}\|_2^2 + \frac{\tau_k}{\sigma_k} (r+1/2)\|\hat{y} - \tilde{y}^{i+1}\|_2^2 \right] \right] \\ &\leq \frac{\rho_k}{\tau_k} [2 + q\mu^2 + (r+1/2)\nu^2] R^2 \\ &= \frac{\rho_k}{\tau_k} \left[ 2 + \frac{q}{1-q} + \frac{r+1/2}{1/2-r} \right] R^2, \end{aligned}$$

i.e., (21). In the second and third inequalities, we used

$$x^{k+1} = \frac{\rho_k}{\gamma_k} \sum_{i=1}^k \gamma_i \tilde{x}^{i+1}, \quad y^{k+1} = \frac{\rho_k}{\gamma_k} \sum_{i=1}^k \gamma_i \tilde{y}^{i+1}, \quad \text{and} \quad \frac{\rho_k}{\gamma_k} \sum_{i=1}^k \gamma_i = 1.$$

□

## B.4 Proof of Corollary 2

*Proof of Corollary 2.* First check if (7), (10), and (24) satisfy (15) and (20). Conditions (20) and (15a) are trivial to see. To prove (15b) and (15c):

$$\begin{aligned} \frac{1-q}{\tau_k} - L_f \rho_k - \frac{L_K^2 \sigma_k}{r} &\geq L_K \left( (1-q)P_2 \frac{N}{k} - \frac{k}{rN} \right) \\ &\geq L_K \left( (1-q)P_2 - \frac{1}{r} \right) \geq 0, \end{aligned}$$

and

$$\frac{1-r}{\sigma_k} - \tau_k \frac{\|B\|_2^2}{q} \geq \left( \frac{(1-r)N}{k} - \frac{(b^2/q)k}{NP_2} \right) L_K \geq \left( (1-r) - \frac{b^2}{qP_2} \right) L_K.$$

Condition (24) also implies that  $\tau_k \leq \sigma_k$ .

Note that

$$\begin{aligned} \frac{\rho_N}{\tau_N} &\leq \frac{4P_1 L_f}{N^2} + \frac{2P_2 L_K}{N} \\ L_K^2 \rho_N \tau_N &\leq \frac{2NL_K^2}{(2P_1 L_f + P_2 N L_K)(N+1)} \leq \frac{2L_K}{P_2 N} \\ \rho_N L_K &\leq \frac{2L_K}{N}. \end{aligned} \tag{B.9}$$

When we put  $\|B\|_2 \leq bL_K$ ,  $\|v^{k+1}\|_2$  is bounded above by

$$\|v^{k+1}\|_2 \leq \frac{\rho_k}{\tau_k} (\|\hat{x} - \tilde{x}^1\|_2 + \|\hat{y} - \tilde{y}^1\|_2) + R \left[ \frac{\rho_k}{\tau_k} \left( \mu + \frac{\tau_1}{\sigma_1} \nu \right) + 2\rho_k L_K (\mu + b\nu) \right].$$

Thus by (B.9), we have

$$\epsilon_{N+1} \leq \delta_{N+1} \leq \left( \frac{4P_1 L_f}{N^2} + \frac{2P_2 L_K}{N} \right) \left[ 2 + \frac{q}{1-q} + \frac{r+1/2}{1/2-r} \right] R^2,$$

which is (25), and

$$\begin{aligned} \|v^{N+1}\|_2 &\leq \frac{4P_1 L_f}{N^2} \left[ (\|\hat{x} - \tilde{x}^1\|_2 + \|\hat{y} - \tilde{y}^1\|_2) + R \left( \mu + \frac{\tau_1}{\sigma_1} \nu \right) \right] \\ &\quad + \frac{L_K}{N} \left[ 2P_2 \left( (\|\hat{x} - \tilde{x}^1\|_2 + \|\hat{y} - \tilde{y}^1\|_2) + R \left( \mu + \frac{\tau_1}{\sigma_1} \nu \right) \right) + 4R(\mu + b\nu) \right], \end{aligned}$$

which is (26). □

## C Optimal stochastic acceleration

In this section, we provide proofs that Algorithm 1 achieves the theoretically optimal rate of convergence in the stochastic settings. Proofs of all the technical lemmas are deferred in Section D.

### C.1 Proof of Theorem 3

We obtain a bound similar to Lemma B.1 first. The following lemma provides the desired upper bound on  $\rho_k^{-1}\gamma_k\mathcal{G}(z^k, z)$ .

**Lemma C.1.** *Assume that  $z^k = (x^k, y^k)$  is the iterates generated by the iteration (6) with  $\widehat{\nabla}f$  satisfying (27). Also assume that the parameters satisfy (15a), (16), and (28). Then for any  $z \in \mathcal{Z}$ , we have*

$$\begin{aligned} \rho_k^{-1}\gamma_k\mathcal{G}(z^{k+1}, z) &\leq \mathcal{D}_k(z, \tilde{z}^{[k]}) - \gamma_k \langle \tilde{x}^{k+1} - x, B^T(\tilde{y}^{k+1} - \tilde{y}^k) \rangle \\ &\quad - \gamma_k \langle K(\tilde{x}^{k+1} - \tilde{x}^k), \tilde{y}^{k+1} - y \rangle \\ &\quad - \gamma_k \left( \frac{s-q}{2\tau_k} - \frac{\rho_k L_f}{2} \right) \|\tilde{x}^{k+1} - \tilde{x}^k\|_2^2 \\ &\quad - \gamma_k \left( \frac{t-r}{2\sigma_k} \right) \|\tilde{y}^{k+1} - \tilde{y}^k\|_2^2 \\ &\quad + \sum_{i=1}^k \Lambda_i(z), \end{aligned} \tag{C.1}$$

where  $\gamma_k$  and  $\mathcal{D}(z, \tilde{z}^{[k]})$  are defined in (B.2) and (B.3), respectively, and

$$\Lambda_i(z) := -\frac{(1-s)\gamma_i}{2\tau_i} \|\tilde{x}^{i+1} - x^i\|_2^2 - \frac{(1-t)\gamma_i}{2\sigma_i} \|\tilde{y}^{i+1} - y^i\|_2^2 - \gamma_i \langle \Delta^i, x^{i+1} - x \rangle.$$

We also need the following lemma to prove Theorem 3. For subsequent uses, we define  $\Delta^k := \widehat{\nabla}f(x_{md}^k) - \nabla f(x_{md}^k)$ .

**Lemma C.2** (Lemma 4.5, Chen et al., 2014). *Let  $\tau_i, \sigma_i$ , and  $\gamma_i > 0$ . For any  $\tilde{z}^1 \in \mathcal{Z}$ , define  $\tilde{z}_v^1 = \tilde{x}^1$  and*

$$x_v^{i+1} = \arg \min_{x \in \mathcal{X}} \left\{ -\tau_i \langle \Delta^i, x \rangle + \frac{1}{2} \|x - x_v^i\|_2^2 \right\}, \tag{C.2}$$

then

$$\sum_{i=1}^k \gamma_i \langle -\Delta^i, x_v^i - x \rangle \leq \mathcal{D}_k(z, \tilde{z}_v^{[k]}) + \sum_{i=1}^k \frac{\tau_i \gamma_i}{2} \|\Delta^i\|_2^2,$$

where  $\tilde{z}_v^{[k]} := \{z_v^i\}_{i=1}^k$ .

*Proof of Theorem 3.* First we use the bounds in (B.5) to obtain

$$\rho_k^{-1}\gamma_k\mathcal{G}(z^{k+1}, z) \leq \frac{\gamma_k}{\tau_k} \Omega_X^2 + \frac{\gamma_k}{\sigma_k} \Omega_Y^2 + \sum_{i=1}^k \Lambda_i(z).$$

Then by the definition of  $\Lambda_i(z)$ , we have

$$\begin{aligned} \Lambda_i(z) &= -\frac{(1-s)\gamma_i}{2\tau_i} \|\tilde{x}^{i+1} - x^i\|_2^2 - \frac{(1-t)\gamma_i}{2\sigma_i} \|\tilde{y}^{i+1} - y^i\|_2^2 + \gamma_i \langle \Delta^i, x - x^{i+1} \rangle \\ &= -\frac{(1-s)\gamma_i}{2\tau_i} \|\tilde{x}^{i+1} - x^i\|_2^2 - \frac{(1-t)\gamma_i}{2\sigma_i} \|\tilde{y}^{i+1} - y^i\|_2^2 + \gamma_i \langle \Delta^i, x^i - x^{i+1} \rangle + \gamma_i \langle \Delta^i, x - x^i \rangle \\ &\leq \frac{\tau_i \gamma_i}{2(1-s)} \|\Delta^i\|_2^2 + \gamma_i \langle \Delta^i, x - x^i \rangle, \end{aligned}$$

where the last line is due to Young's inequality. By this result and Lemma C.2, we have

$$\sum_{i=1}^k \Lambda_i(z) \leq \sum_{i=1}^k \left[ \frac{\tau_i \gamma_i}{2(1-s)} \|\Delta^i\|_2^2 + \gamma_i \langle \Delta^i, x_v^i - x^i \rangle + \gamma_i \langle -\Delta^i, x_v^i - x \rangle \right]$$

$$\leq \mathcal{D}_k(z, \tilde{z}_v^{[k]}) + \frac{1}{2} \sum_{i=1}^k \left[ \frac{(2-s)\tau_i\gamma_i}{1-s} \|\Delta^i\|_2^2 + \gamma_i \langle \Delta^i, x_v^i - x^i \rangle \right]. \quad (\text{C.3})$$

Let us define  $U_k$  as

$$U_k := \frac{1}{2} \sum_{i=1}^k \left[ \frac{(2-s)\tau_i\gamma_i}{1-s} \|\Delta^i\|_2^2 + \gamma_i \langle \Delta^i, x_v^i - x^i \rangle \right] \quad (\text{C.4})$$

for later use.

Note that  $\Delta^i$  and  $x^i$  are independent by the assumptions of stochastic oracle. Thus,

$$\mathbb{E}[U_k] \leq \frac{1}{2} \sum_{i=1}^k \left[ \frac{(2-s)\tau_i\gamma_i\chi^2}{1-s} \right]. \quad (\text{C.5})$$

Similar to (B.4),  $\mathcal{D}_k(z, \tilde{z}_v^{[k]}) \leq \frac{\Omega_X^2\gamma_k}{\tau_k} + \frac{\Omega_Y^2\gamma_k}{\sigma_k}$ . Thus we have:

$$\mathbb{E}[\rho_k^{-1}\gamma_k\mathcal{G}^*(z^{k+1})] \leq \frac{2\gamma_k}{\tau_k}\Omega_X^2 + \frac{2\gamma_k}{\sigma_k}\Omega_Y^2 + \mathbb{E}[U_k].$$

The above relation along with (C.5) implies the desired result.  $\square$

## C.2 Proof of Corollary 3

*Proof of Corollary 3.* First we check (28):

$$\frac{s-q}{\tau_k} - \rho_k L_f - \frac{L_K^2\sigma_k}{r} \geq \frac{L_K\Omega_Y}{\Omega_X} \left( (s-q)P_2 - \frac{1}{r} \right) \geq 0$$

and

$$\frac{t-r}{\sigma_k} - \tau_k \frac{\|B\|_2^2}{q} \geq \left( (t-r) - \frac{b^2/q}{P_2} \right) \frac{\Omega_X L_K}{\Omega_Y} \geq 0,$$

where we use (31). Note that  $\gamma_k = k$ ,  $\sum_{i=1}^k \sqrt{i} \leq \int_1^{k+1} \sqrt{u} du \leq \frac{2}{3}(k+1)^{3/2} \leq \frac{2\sqrt{2}}{3}(k+1)\sqrt{k}$ , so

$$\frac{1}{\gamma_{N-1}} \sum_{i=1}^k \tau_i \gamma_i \leq \frac{\Omega_X}{kP_3\chi} \sum_{i=1}^k \sqrt{i} \leq \frac{2\sqrt{2}\Omega_X(k+1)\sqrt{k}}{3kP_3\chi},$$

which in turn implies

$$\begin{aligned} \mathbb{E}[\mathcal{G}^*(x^{k+1}, y^{k+1})] &\leq \frac{2}{k+1} \left[ \frac{2(2P_1L_f\Omega_X + P_2L_K\Omega_Yk + P_3\chi k^{3/2})}{\Omega_Xk} \Omega_X^2 \right. \\ &\quad \left. + 2\Omega_X\Omega_Y + \frac{2\sqrt{2}(2-s)\Omega_X\chi^2(k+1)\sqrt{k}}{6(1-s)P_3\chi k} \right] \\ &\leq \frac{8P_1L_f\Omega_X^2}{k(k+1)} + \frac{4L_K\Omega_X\Omega_Y(P_2+1)}{k+1} + \left( 4P_3 + \frac{2\sqrt{2}(2-s)}{3P_3(1-s)} \right) \frac{\chi\Omega_X}{\sqrt{k}}. \end{aligned}$$

$\square$

### C.3 Proof of Theorem 4

We need the following lemma to prove Theorem 4.

**Lemma C.3.** *For a saddle point  $\hat{z} = (\hat{x}, \hat{y})$  of (PD), and the parameters  $\rho_k$ ,  $\theta_k$ ,  $\tau_k$ , and  $\sigma_k$  satisfy (15a), (20), and (28), then*

$$\begin{aligned} & (1-q)\|\hat{x} - \tilde{x}^{k+1}\|_2^2 + \|\hat{x} - \tilde{x}_v^{k+1}\|_2^2 + \frac{\tau_k(1/2-r)}{\sigma_k}\|\hat{y} - \tilde{y}^{k+1}\|_2^2 + \frac{\tau_k}{\sigma_k}\|\hat{y} - \tilde{y}_v^{k+1}\|_2^2 \\ & \leq 2\|\hat{x} - \tilde{x}^1\|_2^2 + \frac{2\tau_k}{\sigma_k}\|\hat{y} - \tilde{y}^1\|_2^2 + \frac{2\tau_k}{\gamma_k}U_k, \end{aligned} \quad (\text{C.6})$$

where  $(\tilde{x}_v^{k+1}, \tilde{y}_v^{k+1})$  is defined in (C.2), and  $U_k$  is defined by (C.4).

Furthermore,

$$\tilde{\mathcal{G}}(z^{k+1}, v^{k+1}) \leq \frac{\rho_k}{\tau_k}\|x^{k+1} - \tilde{x}^1\|_2^2 + \frac{\rho_k}{\sigma_k}\|y^{k+1} - \tilde{y}^1\|_2^2 + \frac{\rho_k}{\gamma_k}U_k =: \delta'_{k+1}, \quad (\text{C.7})$$

for  $k \geq 1$ , where

$$v_{k+1} = \rho_k \left( \frac{1}{\tau_k}(2\tilde{x}^1 - \tilde{x}^{k+1} - \tilde{x}_v^{k+1}) - B^T(\tilde{y}^{k+1} - \tilde{y}^k), \frac{1}{\sigma_k}(2\tilde{y}^1 - \tilde{y}^{k+1} - \tilde{y}_v^{k+1}) - K(\tilde{x}^{k+1} - \tilde{x}^k) \right).$$

*Proof of Theorem 4.* By the definition of  $S$  in (35) and (C.5), we have

$$\mathbb{E}[U_k] \leq \frac{\gamma_k}{2\tau_k}S^2.$$

By the above, Lemma C.3, and (23), we have

$$\mathbb{E}[\|\hat{x} - \tilde{x}^{k+1}\|_2^2] \leq \frac{2R^2 + S^2}{1-q} \quad \text{and} \quad \mathbb{E}[\|\hat{y} - \tilde{y}^{k+1}\|_2^2] \leq \frac{(2R^2 + S^2)\sigma_1}{\tau_1(1/2-r)}.$$

Using Jensen's inequality, this leads to

$$\mathbb{E}[\|\hat{x} - \tilde{x}^{k+1}\|_2] \leq \sqrt{\frac{2R^2 + S^2}{1-q}} \quad \text{and} \quad \mathbb{E}[\|\hat{y} - \tilde{y}^{k+1}\|_2] \leq \sqrt{\frac{(2R^2 + S^2)\sigma_1}{\tau_1(1/2-r)}}.$$

Similarly, we have

$$\mathbb{E}[\|\hat{x} - \tilde{x}_v^{k+1}\|_2] \leq \sqrt{2R^2 + S^2} \quad \text{and} \quad \mathbb{E}[\|\hat{y} - \tilde{y}_v^{k+1}\|_2] \leq \sqrt{\frac{(2R^2 + S^2)\sigma_1}{\tau_1}}.$$

Thus

$$\begin{aligned} \mathbb{E}[\|v^{k+1}\|_2] & \leq \rho_k \mathbb{E}\left[\frac{1}{\tau_k}(2\|\hat{x} - \tilde{x}^1\|_2 + \|\hat{x} - \tilde{x}^{k+1}\|_2 + \|\hat{x} - \tilde{x}_v^{k+1}\|_2) \right. \\ & \quad + \frac{1}{\sigma_k}(2\|\hat{y} - \tilde{y}^1\|_2 + \|\hat{y} - \tilde{y}^{k+1}\|_2 + \|\hat{y} - \tilde{y}_v^{k+1}\|_2) \\ & \quad + L_K(\|\hat{x} - \tilde{x}^{k+1}\|_2 + \|\hat{x} - \tilde{x}^k\|_2) \\ & \quad \left. + \|B\|_2(\|\hat{y} - \tilde{y}^{k+1}\|_2 + \|\hat{y} - \tilde{y}^k\|_2)\right] \\ & \leq \frac{2\rho_k\|\hat{x} - \tilde{x}^1\|_2}{\tau_k} + \frac{2\rho_k\|\hat{y} - \tilde{y}^1\|_2}{\sigma_k} \\ & \quad + \sqrt{2R^2 + S^2} \left[ \frac{\rho_k}{\tau_k}(1 + \mu') + \frac{\rho_k}{\sigma_k} \sqrt{\frac{\sigma_1}{\tau_1}}(1 + \nu') \right. \\ & \quad \left. + \rho_k(2L_K\mu' + 2\|B\|_2\nu' \sqrt{\frac{\sigma_1}{\tau_1}}) \right], \end{aligned} \quad (\text{C.8})$$

where  $\mu' = 1/\sqrt{1-q}$  and  $\nu' = 1/\sqrt{1/2-r}$ . Now we find an upper bound of  $\mathbb{E}[\delta'_{k+1}]$ .

$$\begin{aligned}
\mathbb{E}[\delta'_{k+1}] &\leq \mathbb{E} \left[ \frac{2\rho_k}{\tau_k} (\|\hat{x} - x^{k+1}\|_2^2 + \|\hat{x} - \tilde{x}^1\|_2^2) + \frac{2\rho_k}{\sigma_k} (\|\hat{y} - y^{k+1}\|_2^2 + \|\hat{y} - \tilde{y}^1\|_2^2) \right] + \frac{\rho_k}{2\tau_k} S^2 \\
&= \frac{\rho_k}{\tau_k} \mathbb{E} \left[ (2R^2 + 2(1-q)\|\hat{x} - x^{k+1}\|_2^2 + \frac{2\tau_k(1/2-r)}{\sigma_k} \|\hat{y} - y^{k+1}\|_2^2) \right. \\
&\quad \left. + 2q\|\hat{x} - x^{k+1}\|_2^2 + \frac{2\tau_k(r+1/2)}{\sigma_k} \|\hat{y} - y^{k+1}\|_2^2 \right] + \frac{\rho_k}{2\tau_k} S^2 \\
&\leq \frac{\rho_k}{\tau_k} 2R^2 + \frac{2\rho_k}{\gamma_k} \sum_{i=1}^k \gamma_i [(4R^2 + 2S^2) + q\mu'^2(2R^2 + S^2) + (r+1/2)\nu'^2(2R^2 + S^2)] + \frac{S^2}{2} \\
&= \frac{\rho_k}{\tau_k} \left[ 6R^2 + \frac{5}{2}S^2 + \frac{2q}{1-q}(2R^2 + S^2) + \frac{2(r+1/2)}{1/2-r}(2R^2 + S^2) \right] \\
&= \frac{\rho_k}{\tau_k} \left[ \left( 6 + \frac{4q}{1-q} + \frac{4(r+1/2)}{1/2-r} \right) R^2 + \left( \frac{5}{2} + \frac{2q}{1-q} + \frac{2(r+1/2)}{1/2-r} \right) S^2 \right].
\end{aligned}$$

□

#### C.4 Proof of Corollary 4

*Proof of Corollary 4.* First we check (28):

$$\frac{s-q}{\tau_k} - \rho_k L_f - \frac{L_K^2 \sigma_k}{r} \geq L_K \left( (s-q)P_2 - \frac{1}{r} \right) \geq 0,$$

$$\frac{t-r}{\sigma_k} - \tau_k \frac{b^2 L_K^2}{q} \geq L_K \left( (t-r) - \frac{b^2}{qP_2} \right) \geq 0,$$

by (36).

Now, when we put  $\eta = 2P_1 L_f + P_2 L_K(N-1) + P_3 N\sqrt{N-1}$ ,

$$\begin{aligned}
S &= \sqrt{\sum_{i=1}^{N-1} \frac{(2-s)\chi^2 i^2}{(1-s)\eta^2}} \\
&\leq \sqrt{\frac{N^2(N-1)}{3\eta^2} \left( \frac{(2-s)\chi^2}{1-s} \right)} = \frac{\chi' N\sqrt{N-1}}{\sqrt{3}\eta} \\
&\leq \frac{\chi' N\sqrt{N-1}}{\sqrt{3}N\sqrt{N-1}\chi'/\tilde{R}} = \frac{\tilde{R}}{\sqrt{3}},
\end{aligned}$$

where we define  $\chi' = \sqrt{\frac{2-s}{1-s}}\chi$ . Thus  $\epsilon_N$  is bounded above by

$$\epsilon_N \leq \frac{\rho_{N-1}}{\tau_{N-1}} (\zeta R^2 + \xi S^2) \leq \frac{\rho_{N-1}}{\tau_{N-1}} (\zeta R^2 + \xi \frac{\tilde{R}^2}{3}),$$

where  $\zeta = 6 + \frac{4q}{1-q} + \frac{4(r+1/2)}{1/2-r}$  and  $\xi = \frac{5}{2} + \frac{2q}{1-q} + \frac{2(r+1/2)}{1/2-r}$ .

Note that

$$\frac{\rho_{N-1}}{\tau_{N-1}} \|\hat{x} - \tilde{x}^1\|_2 \leq \frac{\rho_{N-1}}{\tau_{N-1}} R, \quad \frac{\rho_{N-1}}{\sigma_{N-1}} \|\hat{y} - \tilde{y}^1\|_2 \leq \frac{\rho_{N-1}}{\tau_{N-1}} \sqrt{\frac{\sigma_1}{\tau_1}} R,$$

since  $\sigma_k \geq \tau_k$ , and that

$$\begin{aligned}\rho_{N-1}L_K &\leq \frac{2L_K}{N}, \\ \frac{\rho_{N-1}}{\tau_{N-1}} &\leq \frac{2\tau}{N(N-1)} = \frac{4P_1L_f + 2P_2L_K(N-1) + 2N\sqrt{N-1}\chi'/\tilde{R}}{N(N-1)} \\ &= \frac{4P_1L_f}{N(N-1)} + \frac{2P_2L_K}{N} + \frac{2\chi'/\tilde{R}}{\sqrt{N-1}}\end{aligned}$$

Thus

$$\begin{aligned}\epsilon_N &\leq \frac{\rho_{N-1}}{\tau_{N-1}}(\zeta R^2 + \xi S^2) \\ &\leq \left( \frac{4P_1L_f}{N(N-1)} + \frac{2P_2L_K}{N} + \frac{2\chi'/\tilde{R}}{\sqrt{N-1}} \right) \left( \zeta R^2 + \frac{\xi \tilde{R}^2}{3} \right).\end{aligned}$$

Now note that  $\sqrt{2R^2 + S^2} \leq \sqrt{2}R + S$ . Thus from (C.8),

$$\begin{aligned}\mathbb{E}[\|v^N\|_2] &\leq \frac{\rho_{N-1}}{\tau_{N-1}} \left[ 2R \left( 1 + \sqrt{\frac{\sigma_1}{\tau_1}} \right) + (\sqrt{2}R + S) \left( 1 + \mu' + \sqrt{\frac{\sigma_1}{\tau_1}}(1 + \nu') \right) \right] + 2\rho_{N-1}L_K(\sqrt{2}R + S) \left( \mu' + b\nu' \sqrt{\frac{\sigma_1}{\tau_1}} \right) \\ &\leq \left( \frac{4P_1L_f}{N(N-1)} + \frac{2P_2L_K}{N} + \frac{2\chi'/\tilde{R}}{\sqrt{N-1}} \right) \left[ 2R \left( 1 + \sqrt{\frac{\sigma_1}{\tau_1}} \right) + (\sqrt{2}R + \tilde{R}/\sqrt{3}) \left( 1 + \mu' + \sqrt{\frac{\sigma_1}{\tau_1}}(1 + \nu') \right) \right] \\ &\quad + \frac{4L_K}{N}(\sqrt{2}R + \tilde{R}/\sqrt{3}) \left( \mu' + b\nu' \sqrt{\frac{\sigma_1}{\tau_1}} \right),\end{aligned}$$

and we obtain the desired order for both  $\epsilon_N$  and  $\mathbb{E}[\|v_N\|_2]$ .  $\square$

## D Proofs of technical lemmas

*Proof of Lemma B.1.* Loris and Verhoeven (2011, Lemma 1) state that if  $\phi : \mathbb{R}^n \rightarrow \mathbb{R} \cup \{+\infty\}$  is a convex, closed, and proper, and if  $x^+ = \mathbf{prox}_{\sigma\phi}(x^- + \sigma\Delta)$ , then for any  $x \in \mathbb{R}^n$ ,

$$\langle x - x^+, \Delta \rangle - \phi^*(x) + \phi^*(x^+) \leq \frac{1}{2\sigma} (\|x - x^-\|_2^2 - \|x - x^+\|_2^2 - \|x^- - x^+\|_2^2). \quad (\text{D.1})$$

Applying inequality (D.1) to equations (6c) and (6e), we have

$$\begin{aligned}\langle y - \tilde{y}^{k+1}, \tilde{u}^{k+1} \rangle + h^*(\tilde{y}^{k+1}) - h^*(y) &\leq \frac{1}{2\sigma_k} (\|y - \tilde{y}^k\|_2^2 - \|\tilde{y}^{k+1} - \tilde{y}^k\|_2^2 - \|y - \tilde{y}^{k+1}\|_2^2), \\ \langle \tilde{x}^{k+1} - x, \nabla f(x_{md}^k) + \tilde{v}^{k+1} \rangle + g(\tilde{x}^{k+1}) - g(x) &\leq \frac{1}{2\tau_k} (\|x - \tilde{x}^k\|_2^2 - \|\tilde{x}^{k+1} - \tilde{x}^k\|_2^2 - \|x - \tilde{x}^{k+1}\|_2^2).\end{aligned}$$

Using the above relationship along with Proposition 1, we obtain the following.

$$\begin{aligned}\rho_k^{-1}\mathcal{G}(z^{k+1}, z) - (\rho_k^{-1} - 1)\mathcal{G}(z^k, z) &\leq \frac{1}{2\tau_k} (\|x - \tilde{x}^k\|_2^2 - \|x - \tilde{x}^{k+1}\|_2^2) - \left( \frac{1}{2\tau_k} - \frac{L_f\rho_k}{2} \right) \|\tilde{x}^{k+1} - \tilde{x}^k\|_2^2 \\ &\quad + \frac{1}{2\sigma_k} (\|y - \tilde{y}^k\|_2^2 - \|y - \tilde{y}^{k+1}\|_2^2) - \frac{1}{2\sigma_k} \|\tilde{y}^{k+1} - \tilde{y}^k\|_2^2 \\ &\quad - \langle \tilde{x}^{k+1} - x, \tilde{v}^{k+1} \rangle + \langle \tilde{u}^{k+1}, \tilde{y}^{k+1} - y \rangle + \langle K\tilde{x}^{k+1}, y \rangle - \langle Kx, \tilde{y}^{k+1} \rangle.\end{aligned}$$

The sum of the four inner products on the last line, namely,  $-\langle \tilde{x}^{k+1} - x, \tilde{v}^{k+1} \rangle + \langle \tilde{u}^{k+1}, \tilde{y}^{k+1} - y \rangle + \langle K\tilde{x}^{k+1}, y \rangle - \langle Kx, \tilde{y}^{k+1} \rangle$ , multiplied by  $\gamma_k$  can be computed as follows.

$$\gamma_k[-\langle \tilde{x}^{k+1} - x, \tilde{v}^{k+1} \rangle + \langle \tilde{u}^{k+1}, \tilde{y}^{k+1} - y \rangle + \langle K\tilde{x}^{k+1}, y \rangle - \langle Kx, \tilde{y}^{k+1} \rangle]$$

$$\begin{aligned}
&= \gamma_k [ - (\langle \tilde{x}^{k+1} - x, B^T(\tilde{y}^{k+1} - \tilde{y}^k) \rangle - \theta_k \langle \tilde{x}^{k+1} - x, B^T(\tilde{y}^k - \tilde{y}^{k-1}) \rangle) \\
&\quad - (\langle K(\tilde{x}^{k+1} - \tilde{x}^k), \tilde{y}^{k+1} - y \rangle + \theta_k \langle K(\tilde{x}^k - \tilde{x}^{k-1}), \tilde{y}^{k+1} - y \rangle) \\
&= - (\gamma_k \langle \tilde{x}^{k+1} - x, B^T(\tilde{y}^{k+1} - \tilde{y}^k) \rangle - \gamma_{k-1} \langle \tilde{x}^k - x, B^T(\tilde{y}^k - \tilde{y}^{k-1}) \rangle) \\
&\quad - (\gamma_k \langle K(\tilde{x}^{k+1} - \tilde{x}^k), \tilde{y}^{k+1} - y \rangle + \gamma_{k-1} \langle K(\tilde{x}^k - \tilde{x}^{k-1}), \tilde{y}^k - y \rangle) \\
&\quad + \gamma_{k-1} \langle \tilde{x}^{k+1} - \tilde{x}^k, B^T(\tilde{y}^k - \tilde{y}^{k-1}) \rangle + \gamma_{k-1} \langle K(\tilde{x}^k - \tilde{x}^{k-1}), \tilde{y}^{k+1} - \tilde{y}^k \rangle
\end{aligned}$$

By upper bounding the inner product terms, and noting that  $\theta_k = \gamma_{k-1}/\gamma_k = \tau_{k-1}/\tau_k = \sigma_{k-1}/\sigma_k$ , we have

$$\begin{aligned}
|\gamma_{k-1} \langle \tilde{x}^{k+1} - \tilde{x}^k, B^T(\tilde{y}^k - \tilde{y}^{k-1}) \rangle| &\leq \frac{\gamma_k q}{2\tau_k} \|\tilde{x}^{k+1} - \tilde{x}^k\|_2^2 + \frac{\|B\|_2^2 \gamma_{k-1} \tau_{k-1}}{2q} \|\tilde{y}^k - \tilde{y}^{k-1}\|_2^2 \\
|\gamma_{k-1} \langle \tilde{x}^k - \tilde{x}^{k-1}, A^T(\tilde{y}^{k+1} - \tilde{y}^k) \rangle| &\leq \frac{L_K^2 \gamma_{k-1} \sigma_{k-1}}{2r} \|\tilde{x}^k - \tilde{x}^{k-1}\|_2^2 + \frac{\gamma_k r}{2\sigma_k} \|\tilde{y}^{k+1} - \tilde{y}^k\|_2^2
\end{aligned}$$

for some positive  $q$  and  $r$ . Thus

$$\begin{aligned}
&\rho_k^{-1} \gamma_k \mathcal{G}(z^{k+1}, z) - (\rho_k^{-1} - 1) \gamma_k \mathcal{G}(z^k, z) \\
&\leq \frac{\gamma_k}{2\tau_k} (\|x - \tilde{x}^k\|_2^2 - \|x - \tilde{x}^{k+1}\|_2^2) + \frac{\gamma_k}{2\sigma_k} (\|y - \tilde{y}^k\|_2^2 - \|y - \tilde{y}^{k+1}\|_2^2) \\
&\quad - (\gamma_k \langle \tilde{x}^{k+1} - x, B^T(\tilde{y}^{k+1} - \tilde{y}^k) \rangle - \gamma_{k-1} \langle \tilde{x}^k - x, B^T(\tilde{y}^k - \tilde{y}^{k-1}) \rangle) \\
&\quad - (\gamma_k \langle \tilde{x}^{k+1} - \tilde{x}^k, K^T(\tilde{y}^{k+1} - y) \rangle - \gamma_{k-1} \langle \tilde{x}^k - \tilde{x}^{k-1}, K^T(\tilde{y}^k - y) \rangle) \\
&\quad - \gamma_k \left( \frac{1-q}{2\tau_k} - \frac{L_f \rho_k}{2} \right) \|\tilde{x}^{k+1} - \tilde{x}^k\|_2^2 + \frac{L_K^2 \gamma_{k-1} \sigma_{k-1}}{2r} \|\tilde{x}^k - \tilde{x}^{k-1}\|_2^2 \\
&\quad - \gamma_k \left( \frac{1-r}{2\sigma_k} \right) \|\tilde{y}^{k+1} - \tilde{y}^k\|_2^2 + \frac{\gamma_{k-1} \tau_{k-1} \|B\|_2^2}{2q} \|\tilde{y}^k - \tilde{y}^{k-1}\|_2^2.
\end{aligned}$$

Recursively applying the above relation, we obtain the following:

$$\begin{aligned}
&\rho_k^{-1} \gamma_k \mathcal{G}(z^{k+1}, z) \\
&\leq \mathcal{D}_k(z, \tilde{z}^{[k]}) - \gamma_k (\langle \tilde{x}^{k+1} - x, B^T(\tilde{y}^{k+1} - \tilde{y}^k) \rangle + \langle \tilde{x}^{k+1} - \tilde{x}^k, K^T(\tilde{y}^{k+1} - y) \rangle) \\
&\quad - \gamma_k \left( \frac{1-q}{2\tau_k} - \frac{L_f \rho_k}{2} \right) \|\tilde{x}^{k+1} - \tilde{x}^k\|_2^2 - \gamma_k \left( \frac{1-r}{2\sigma_k} \right) \|\tilde{y}^{k+1} - \tilde{y}^k\|_2^2 \\
&\quad - \sum_{i=1}^{k-1} \gamma_i \left( \frac{1-q}{2\tau_i} - \frac{L_f \rho_k}{2} - \frac{L_K^2 \sigma_i}{2r} \right) \|\tilde{x}^{i+1} - \tilde{x}^i\|_2^2 \\
&\quad - \sum_{i=1}^{k-1} \gamma_i \left( \frac{1-r}{2\sigma_i} - \frac{\tau_i \|B\|_2^2}{2q} \right) \|\tilde{y}^{i+1} - \tilde{y}^i\|_2^2.
\end{aligned}$$

Thus by the conditions (15), the desired result holds.  $\square$

*Proof of Lemma B.2.* First, let us prove (B.6). The conditions for Lemma B.1 clearly holds. Note that

$$\begin{aligned}
\mathcal{D}_k(z, \tilde{z}^{[k]}) &= \frac{\gamma_1}{2\tau_1} \|x - \tilde{x}^1\|_2^2 - \sum_{i=1}^{k-1} \left( \frac{\gamma_i}{2\tau_i} - \frac{\gamma_{i+1}}{2\tau_{i+1}} \right) \|x - \tilde{x}^{i+1}\|_2^2 - \frac{\gamma_k}{2\tau_k} \|x - \tilde{x}^{k+1}\|_2^2 \\
&\quad + \frac{\gamma_1}{2\sigma_1} \|y - \tilde{y}^1\|_2^2 - \sum_{i=1}^{k-1} \left( \frac{\gamma_i}{2\sigma_i} - \frac{\gamma_{i+1}}{2\sigma_{i+1}} \right) \|y - \tilde{y}^{i+1}\|_2^2 - \frac{\gamma_k}{2\sigma_k} \|y - \tilde{y}^{k+1}\|_2^2.
\end{aligned}$$

By (20), one may see that

$$\gamma_k^{-1} \mathcal{D}_k(z, \tilde{z}^{[k]}) = \frac{1}{2\tau_k} \|x - \tilde{x}^1\|_2^2 - \frac{1}{2\tau_k} \|x - \tilde{x}^{k+1}\|_2^2 + \frac{1}{2\sigma_k} \|y - \tilde{y}^1\|_2^2 - \frac{1}{2\sigma_k} \|y - \tilde{y}^{k+1}\|_2^2.$$

Thus (B.1) in Lemma B.1 is equivalent to

$$\begin{aligned}\rho_k^{-1}\mathcal{G}(z^{k+1}, z) &\leq \frac{1}{2\tau_k}\|x - \tilde{x}^1\|_2^2 - \frac{1}{2\tau_k}\|x - \tilde{x}^{k+1}\|_2^2 + \frac{1}{2\sigma_k}\|y - \tilde{y}^1\|_2^2 - \frac{1}{2\sigma_k}\|y - \tilde{y}^{k+1}\|_2^2 \\ &\quad - \langle \tilde{x}^{k+1} - x, B^T(\tilde{y}^{k+1} - \tilde{y}^k) \rangle - \gamma_k \langle K(\tilde{x}^{k+1} - \tilde{x}^k), \tilde{y}^{k+1} - y \rangle \\ &\quad - \left( \frac{1-q}{2\tau_k} - \frac{L_f \rho_k}{2} \right) \|\tilde{x}^{k+1} - \tilde{x}^k\|_2^2 \\ &\quad - \left( \frac{1-r}{2\sigma_k} \right) \|\tilde{y}^{k+1} - \tilde{y}^k\|_2^2.\end{aligned}$$

Note that

$$\begin{aligned}|\langle K(\tilde{x}^{k+1} - \tilde{x}^k), \tilde{y}^{k+1} - y \rangle| &\leq \frac{L_K^2 \sigma_k}{2r} \|\tilde{x}^{k+1} - \tilde{x}^k\|_2^2 + \frac{r}{2\sigma_k} \|\tilde{y}^{k+1} - y\|_2^2 \\ |\langle \tilde{x}^{k+1} - x, B^T(\tilde{y}^{k+1} - \tilde{y}^k) \rangle| &\leq \frac{q}{2\tau_k} \|\tilde{x}^{k+1} - x\|_2^2 + \frac{\|B\|_2^2 \tau_k}{2q} \|\tilde{y}^{k+1} - \tilde{y}^k\|_2^2.\end{aligned}\tag{D.2}$$

Thus

$$\begin{aligned}\rho_k^{-1}\mathcal{G}(z^{k+1}, z) &\leq \frac{1}{2\tau_k}\|x - \tilde{x}^1\|_2^2 - \frac{1-q}{2\tau_k}\|x - \tilde{x}^{k+1}\|_2^2 \\ &\quad + \frac{1}{2\sigma_k}\|y - \tilde{y}^1\|_2^2 - \frac{1}{2\sigma_k} \left( 1 - r - \frac{1}{2} \right) \|y - \tilde{y}^{k+1}\|_2^2 \\ &\quad - \left( \frac{1-q}{2\tau_k} - \frac{L_f \rho_k}{2} - \frac{L_K^2 \sigma_k}{2r} \right) \|\tilde{x}^{k+1} - \tilde{x}^k\|_2^2 \\ &\quad - \left( \frac{1-r}{2\sigma_k} - \frac{\|B\|_2^2 \tau_k}{2q} \right) \|\tilde{y}^{k+1} - \tilde{y}^k\|_2^2.\end{aligned}$$

Hence

$$\rho_k^{-1}\mathcal{G}(z^{k+1}, z) \leq \frac{1}{2\tau_k}\|x - \tilde{x}^1\|_2^2 - \frac{1-q}{2\tau_k}\|x - \tilde{x}^{k+1}\|_2^2 + \frac{1}{2\sigma_k}\|y - \tilde{y}^1\|_2^2 - \frac{1/2-r}{2\sigma_k}\|y - \tilde{y}^{k+1}\|_2^2.$$

Since  $\mathcal{G}(z^{k+1}, \hat{z}) \geq 0$ , we obtain

$$\|x - \tilde{x}^1\|_2^2 + \frac{\tau_k}{\sigma_k} \|y - \tilde{y}^1\|_2^2 \geq (1-q)\|x - \tilde{x}^{k+1}\|_2^2 + \frac{\tau_k}{\sigma_k} (1/2-r)\|y - \tilde{y}^{k+1}\|_2^2.$$

Next, we prove (B.7). Note that

$$\begin{aligned}\|x - \tilde{x}^1\|_2^2 - \|x - \tilde{x}^{k+1}\|_2^2 &= 2\langle \tilde{x}^{k+1} - \tilde{x}^1, x - x^{k+1} \rangle + \|x^{k+1} - \tilde{x}^1\|_2^2 - \|x^{k+1} - \tilde{x}^{k+1}\|_2^2 \\ \|y - \tilde{y}^1\|_2^2 - \|y - \tilde{y}^{k+1}\|_2^2 &= 2\langle \tilde{y}^{k+1} - \tilde{y}^1, y - y^{k+1} \rangle + \|y^{k+1} - \tilde{y}^1\|_2^2 - \|y^{k+1} - \tilde{y}^{k+1}\|_2^2.\end{aligned}\tag{D.3}$$

From this, we have:

$$\begin{aligned}\rho_k^{-1}\mathcal{G}(z^{k+1}, z) &= \frac{1}{\tau_k} \langle \tilde{x}^1 - \tilde{x}^{k+1}, x^{k+1} - x \rangle - \frac{1}{\sigma_k} \langle \tilde{y}^1 - \tilde{y}^{k+1}, y^{k+1} - y \rangle \\ &\quad - \langle x - x^{k+1}, B^T(\tilde{y}^{k+1} - \tilde{y}^k) \rangle - \langle K(\tilde{x}^{k+1} - \tilde{x}^k), y - y^{k+1} \rangle \\ &\leq \frac{1}{2\tau_k} (\|x^{k+1} - \tilde{x}^1\|_2^2 - \|x^{k+1} - \tilde{x}^{k+1}\|_2^2) + \frac{1}{2\sigma_k} (\|y^{k+1} - \tilde{y}^1\|_2^2 - \|y^{k+1} - \tilde{y}^{k+1}\|_2^2) \\ &\quad - \left( \frac{1-q}{2\tau_k} - \frac{L_f \rho_k}{2} \right) \|\tilde{x}^{k+1} - \tilde{x}^k\|_2^2 - \left( \frac{1-r}{2\sigma_k} \right) \|\tilde{y}^{k+1} - \tilde{y}^k\|_2^2 \\ &\quad - \langle \tilde{x}^{k+1} - x^{k+1}, B^T(\tilde{y}^{k+1} - \tilde{y}^k) \rangle - \langle K(\tilde{x}^{k+1} - \tilde{x}^k), \tilde{y}^{k+1} - y^{k+1} \rangle \\ &\leq \frac{1}{2\tau_k} \|x^{k+1} - \tilde{x}^k\|_2^2 + \frac{1}{2\sigma_k} \|y^{k+1} - \tilde{y}^1\|_2^2 - \frac{1-q}{2\tau_k} \|x^{k+1} - \tilde{x}^{k+1}\|_2^2 - \frac{1/2-r}{2\sigma_k} \|y^{k+1} - \tilde{y}^{k+1}\|_2^2\end{aligned}$$

$$\begin{aligned}
& - \left( \frac{1-q}{2\tau_k} - \frac{L_f \rho_k}{2} - \frac{L_K^2 \sigma_k}{2r} \right) \|\tilde{x}^{k+1} - \tilde{x}^k\|_2^2 - \left( \frac{1-r}{2\sigma_k} - \frac{\|B\|_2^2 \tau_k}{2q} \right) \|\tilde{y}^{k+1} - \tilde{y}^k\|_2^2 \\
& \leq \frac{1}{2\tau_k} \|x^{k+1} - \tilde{x}^1\|_2^2 + \frac{1}{2\sigma_k} \|y^{k+1} - \tilde{y}^1\|_2^2.
\end{aligned}$$

In the penultimate inequality, the upper bound for inner product terms similar to (D.2) was used.  $\square$

*Proof of Lemma C.1.* Analogous to the proof of Lemma B.1, except for that we start with

$$\begin{aligned}
\langle -\tilde{u}_{k+1}, \tilde{y}^{k+1} - y \rangle + h^*(\tilde{y}^{k+1}) - h^*(y) & \leq \frac{1}{2\sigma_k} \|y - \tilde{y}^k\|_2^2 - \frac{1}{2\sigma_k} \|\tilde{y}^{k+1} - \tilde{y}^k\|_2^2 - \frac{1}{2\sigma_k} \|y - \tilde{y}^{k+1}\|_2^2 \\
\langle \hat{\mathcal{F}}(x_{md}^k), \tilde{x}^{k+1} - x \rangle + \langle \tilde{x}^{k+1} - x, \tilde{v}_{k+1} \rangle & \leq \frac{1}{2\tau_k} \|x - \tilde{x}^k\|_2^2 - \frac{1}{2\tau_k} \|\tilde{x}^{k+1} - \tilde{x}^k\|_2^2 - \frac{1}{2\tau_k} \|x - \tilde{x}^{k+1}\|_2^2.
\end{aligned}$$

$\square$

*Proof of Lemma C.3.* By applying the bounds (D.2) and (C.3) to (C.1), we obtain:

$$\rho_k^{-1} \gamma_k \mathcal{G}(z^{k+1}, z) \leq \bar{\mathcal{D}}_k(z, \tilde{z}^{[k]}) + \frac{q\gamma_k}{2\tau_k} \|x - \tilde{x}^{k+1}\|_2^2 + \frac{(r+1/2)\gamma_k}{2\sigma_k} \|y - \tilde{y}^{k+1}\|_2^2 + \bar{\mathcal{D}}_k(z, \tilde{z}_v^{[k]}) + U_k,$$

where

$$\bar{\mathcal{D}}_k(z, \tilde{z}^{[k]}) = \frac{\gamma_k}{2\tau_k} (\|x - \tilde{x}_1\|_2^2 - \|x - \tilde{x}_{k+1}\|_2^2) + \frac{\gamma_k}{2\sigma_k} (\|y - \tilde{y}_1\|_2^2 - \|y - \tilde{y}_{k+1}\|_2^2).$$

Letting  $z = \hat{z}$  and using  $\mathcal{G}(z^{k+1}, \hat{z}) \geq 0$  leads to (C.6). If we only use (C.3) on (C.1), we get:

$$\begin{aligned}
\rho_k^{-1} \gamma_k \mathcal{G}(z^{k+1}, z) & \leq \bar{\mathcal{D}}_k(z, \tilde{z}^{[k]}) - \gamma_k \langle \tilde{x}^{k+1} - x, B^T(\tilde{y}^{k+1} - \tilde{y}^k) \rangle \\
& \quad - \gamma_k \langle K(\tilde{x}^{k+1} - \tilde{x}^k), \tilde{y}^{k+1} - y \rangle
\end{aligned}$$

Applying (D.3) and following the steps of Lemma B.2 results in (C.7).  $\square$

## References

Loris, I. and Verhoeven, C. (2011). On a generalization of the iterative soft-thresholding algorithm for the case of non-separable penalty, *Inverse Problems* **27**(12): 125007.
